# Supplementary material
Source: PubMed Central journal article supplement (PMC5894265)
Supplement: ba017731-suppl1.pdf [file ba017731-suppl1.pdf]

**Supplemental Table 1. Donor laboratory testing for FMT donors.**

|                                                                                                         |
|---------------------------------------------------------------------------------------------------------|
| <b>General Health Laboratory Tests</b>                                                                  |
| C-Reactive Protein, high sensitivity                                                                    |
| Screening Lipid Panel                                                                                   |
| Comprehensive Metabolic Panel (SMA-20)                                                                  |
| CBC w. Differential                                                                                     |
| ANA                                                                                                     |
| <b>Stool Testing</b>                                                                                    |
| <i>Clostridium difficile</i> toxin by PCR                                                               |
| Stool Culture (for usual enteric pathogens and Vibrio)                                                  |
| Rotavirus Antigen Detection ELISA                                                                       |
| OVA & Parasites (including Giardia & Cryptosporidium)                                                   |
| VRE Rectal Screen                                                                                       |
| MRSA Nasal Screen                                                                                       |
| <i>H. pylori</i> antigen                                                                                |
| MRSA and VRE rectal swab                                                                                |
| <i>Listeria monocytogenes</i> stool culture (modified Oxford Medium)                                    |
| Carbapenemase-resistant <i>Enterobacteraceae</i> screen (HardyCHROM-CRE)                                |
| <b>Virology – Serum quantitative PCR (within 2 weeks of start and at conclusion of donation period)</b> |
| CMV, PCR/Mayo Laboratories                                                                              |
| EBV, PCR/Mayo Laboratories                                                                              |
| <b>Serologic Testing (within 2 weeks of start and at conclusion of donation period)</b>                 |
| Hepatitis A (IgG+IgM)                                                                                   |
| Hepatitis B Surface Ag                                                                                  |
| Hepatitis B Surface Ab                                                                                  |
| Hepatitis C Antibody screen                                                                             |
| HIV Screen (Antibody/Antigen)                                                                           |
| Syphilis Ab Screen (TrepSure)                                                                           |

**Table 2. Antibiotic exposure**

| Patient | Antibiotic exposure during HCT hospitalization (prior to FMT) | Reason for antibiotic therapy                         | Antibiotic exposure after FMT (up to Day +60) | Reason for antibiotic therapy        |
|---------|---------------------------------------------------------------|-------------------------------------------------------|-----------------------------------------------|--------------------------------------|
| 1       | vancomycin                                                    | <i>C. diff.</i> colitis                               | none                                          | --                                   |
| 2       | none                                                          | --                                                    | none                                          | --                                   |
| 3       | ceftazidime                                                   | neutropenic fever                                     | none                                          | --                                   |
| 4       | vancomycin, cefepime<br>→ ciprofloxacin                       | <i>Klebsiella</i> bacteremia                          | metronidazole, vancomycin                     | <i>C. diff.</i> colitis              |
| 6       | vancomycin, ceftazidime                                       | <i>C. diff.</i> colitis, <i>Klebsiella</i> bacteremia | none                                          | --                                   |
| 11      | ceftazidime, vancomycin, piperacillin/tazobactam, meropenem   | neutropenic fever, <i>Klebsiella</i> bacteremia       | ciprofloxacin                                 | BK cystitis                          |
| 12      | ceftazidime, vancomycin                                       | neutropenic fever, <i>C. diff.</i> colitis            | none                                          | --                                   |
| 13      | cefepime, vancomycin                                          | neutropenic fever, pneumonia                          | none                                          | --                                   |
| 14      | ciprofloxacin                                                 | prophylaxis                                           | none                                          | --                                   |
| 15      | ciprofloxacin                                                 | prophylaxis                                           | none                                          | --                                   |
| 16      | ciprofloxacin → cefepime                                      | prophylaxis, neutropenic fever                        | none                                          | --                                   |
| 17      | ciprofloxacin → ceftazidime                                   | prophylaxis, neutropenic fever                        | meropenem, metronidazole, vancomycin          | sepsis, <i>Klebsiella</i> bacteremia |
| 18      | ciprofloxacin → ceftazidime                                   | prophylaxis, neutropenic fever                        | none                                          | --                                   |
